# Supplementary material
Source: PubMed Central journal article supplement (PMC6687558)
Supplement: NIHMS1529963-supplement-2.pdf [file NIHMS1529963-supplement-2.pdf]

**Supplemental Items**

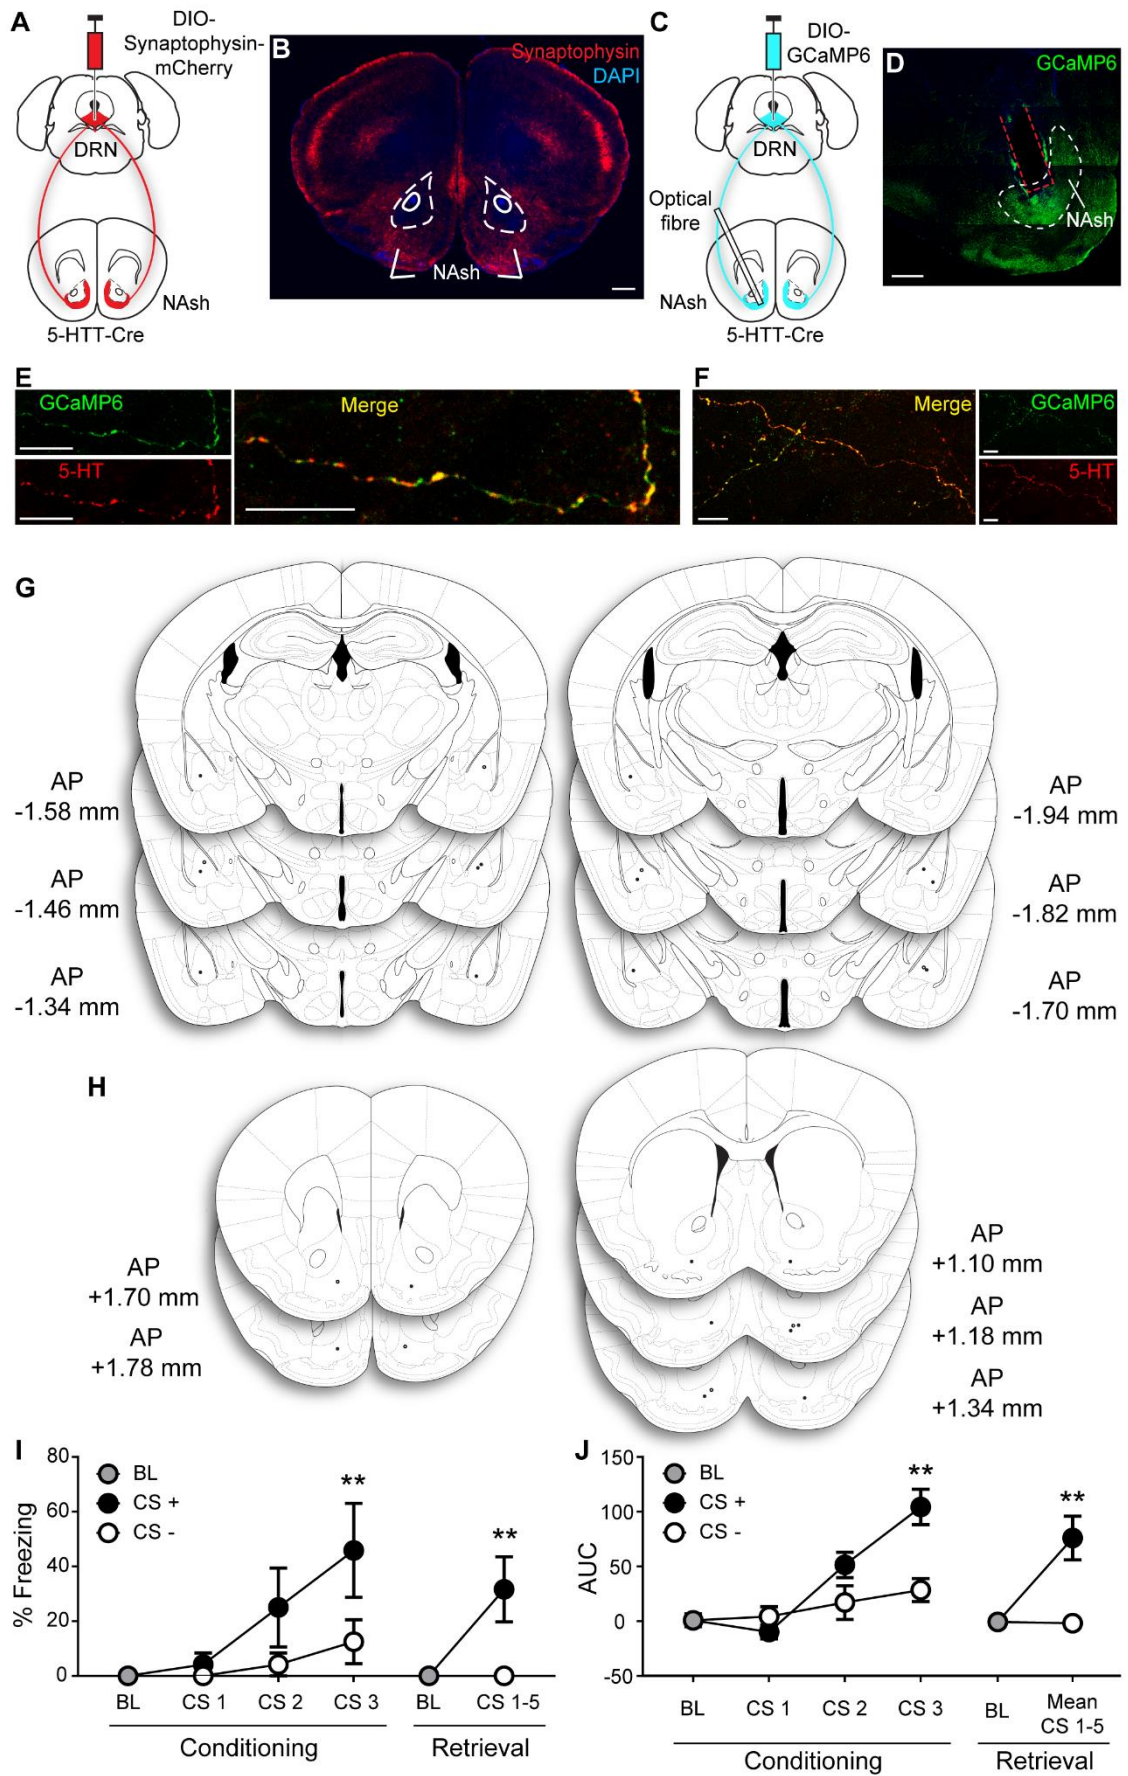

**Figure S1, related to Figure 1**

**BA and NA placements for *in vivo* fibre photometry of DRN 5-HT projections**

(A-B) Cre-dependent fluorescent synaptophysin injection into DRN of 5-HTT-Cre mice (A). Fluorescent synaptophysin expression in DRN 5-HT projections in NA (B). Scale bar=500  $\mu$ m.

(C-D) Cre-dependent GCaMP6 injection into DRN and unilateral optical fibre implantation into NA of 5-HTT-Cre mice (C). GCaMP6 expression in DRN 5-HT projections in NA (D). Dashed red lines=optical fibre tract. Scale bar=500  $\mu$ m.

(E-F) Overlap of GCaMP6 expression and 5-HT immunoreactivity in axons in BA (E) and NA (F). Scale bars=10  $\mu$ m.

(G-H) BA (G) and NA (H) placements of optical fibre implants in GCaMP6-injected 5-HTT-Cre mice. Dots demarcate fibre tip placement; solid are from GCaMP6 and empty from YFP animals.

(I-J) Freezing behaviour (I) and DRN→BA 5-HT projection activity (J) were higher during CS+ compared to CS- presentations in a discriminative fear conditioning task. Data are mean $\pm$ SEM. AUC—area under the curve, BL—baseline, NAsh—nucleus accumbens shell.

\*\*p<0.01.

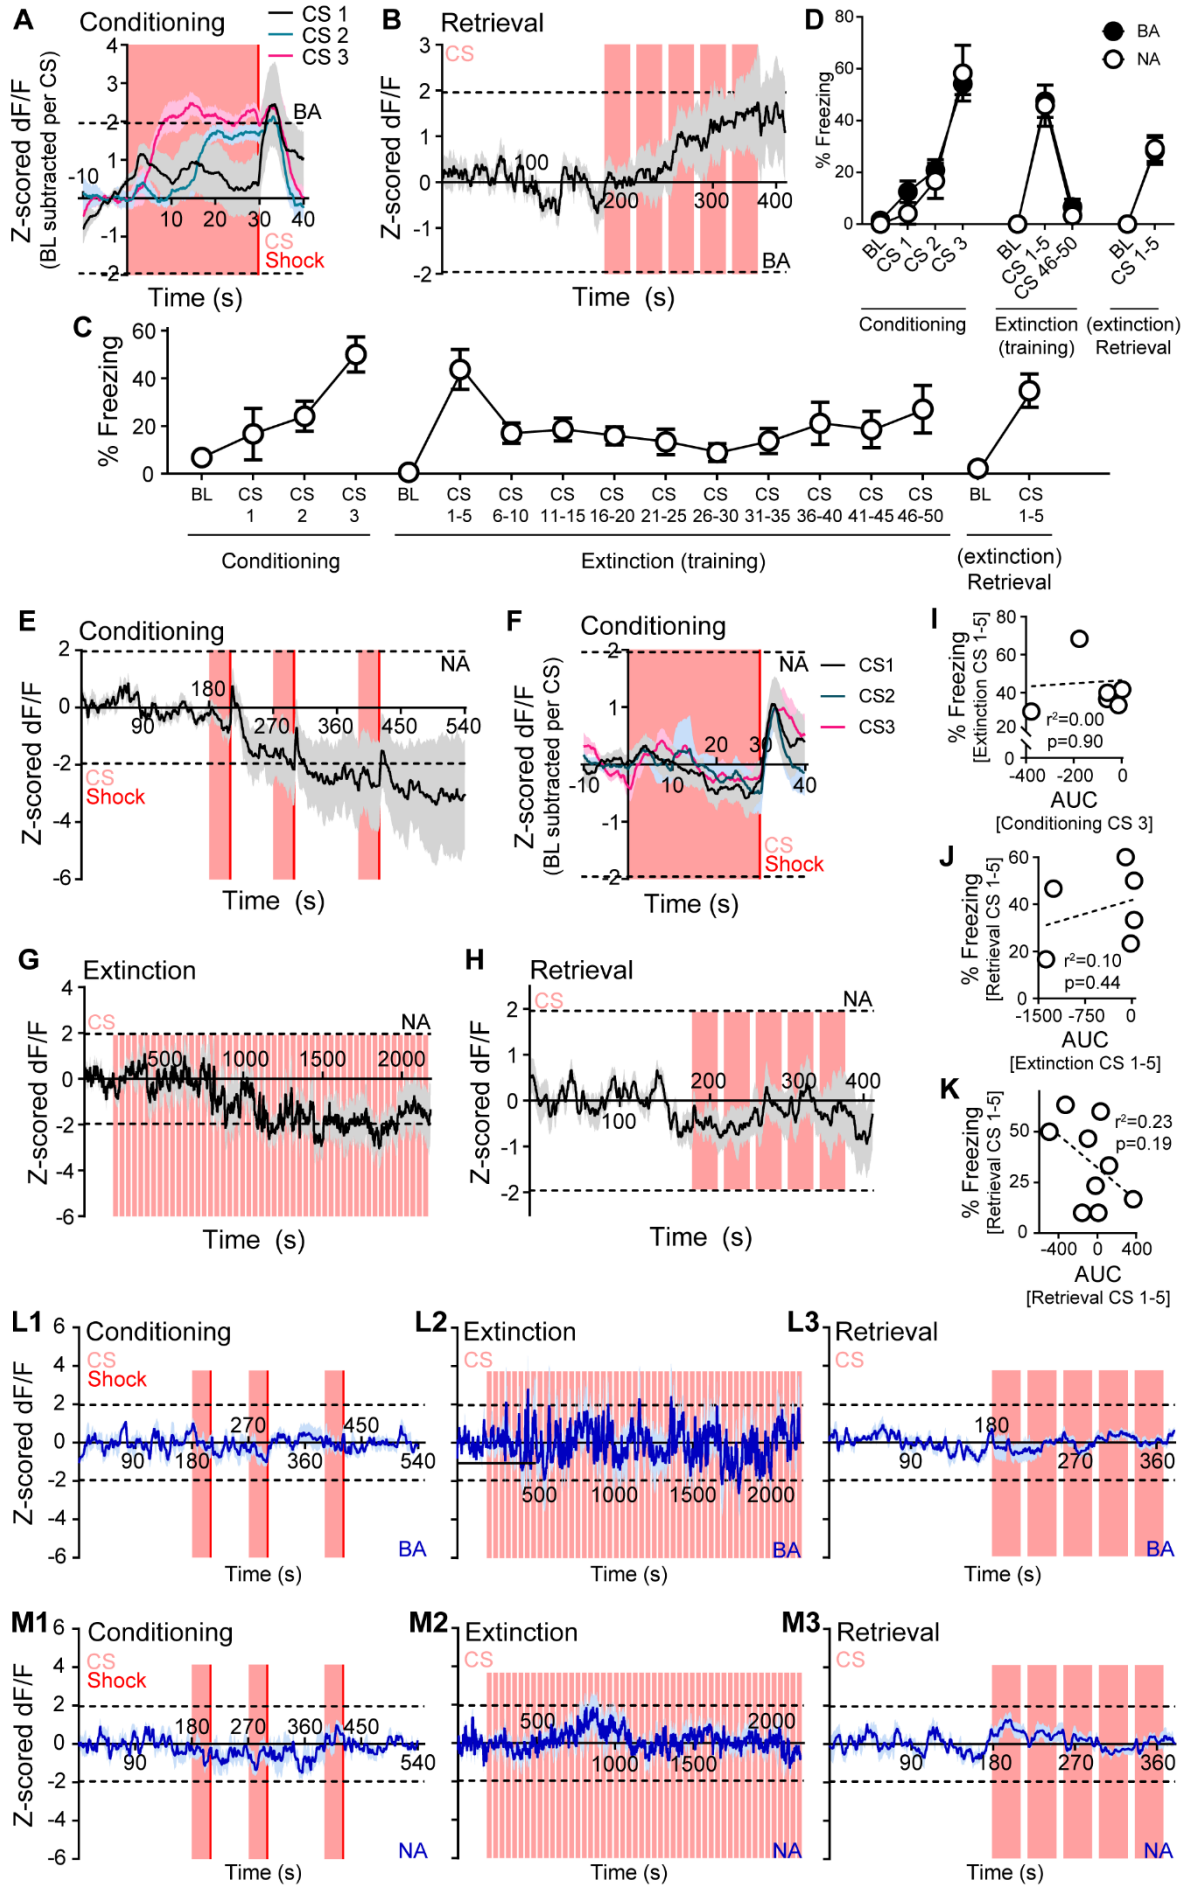

**Figure S2, related to Figure 1**

**Distinct DRN 5-HT projection activity in BA and NA during fear learning**

(A-B) Increasingly elevated DRN→BA 5-HT projection activity per CS (baseline-subtracted) during conditioning (n=7 mice) (A). DRN→BA 5-HT projection activity did not change significantly during retrieval (n=8 mice) (B). Traces show mean±SEM of z-scored dF/F GCaMP fluorescence. Dashed lines at ±1.96 demarcate statistically significant change from baseline (2-tailed,  $\alpha=0.05$ ).

(C) Freezing of DRN GCaMP6-injected and NA optical fibre-implanted 5-HTT-Cre mice during the fear learning task (n=9 mice). Data are mean±SEM.

(D) Freezing of DRN YFP-injected and BA or NA optical fibre-implanted 5-HTT-Cre mice during the fear learning task (BA n=4 mice, NA n=4 mice). Data are mean±SEM.

(E-H) DRN→NA 5-HT projection activity did not change significantly during conditioning (n=9 mice) (E), per conditioning CS (baseline-subtracted) (n=9 mice) (F), during extinction (n=6 mice) (G), or during retrieval (n=9 mice) (H). Traces show mean±SEM of z-scored dF/F GCaMP fluorescence. Dashed lines at ±1.96 demarcate statistically significant change from baseline (2-tailed,  $\alpha=0.05$ ).

(I-K) DRN→NA 5-HT projection activity during the previous conditioning session did not correlate with freezing behaviour during extinction (n=6 mice) (I). DRN→NA 5-HT projection activity during the previous extinction session did not correlate with freezing behaviour during retrieval (n=6 mice) (J). DRN→NA 5-HT projection activity did not correlate with freezing behaviour during retrieval (n=9 mice) (K).

(L1-L3) YFP fluorescence in DRN→BA 5-HT projections did not change significantly during conditioning (L1), extinction (L2), or retrieval (L3). Traces show mean±SEM of z-scored dF/F YFP fluorescence. Dashed lines at ±1.96 demarcate statistically significant change from baseline (2-tailed,  $\alpha=0.05$ ).

(M1-M3) YFP fluorescence in DRN→NA 5-HT projections did not change significantly during conditioning (M1), extinction (M2), or retrieval (M3). Traces show mean±SEM of z-scored dF/F YFP fluorescence. Dashed lines at ±1.96 demarcate statistically significant change from baseline (2-tailed,  $\alpha=0.05$ ).

AUC—area under the curve, BL—baseline.

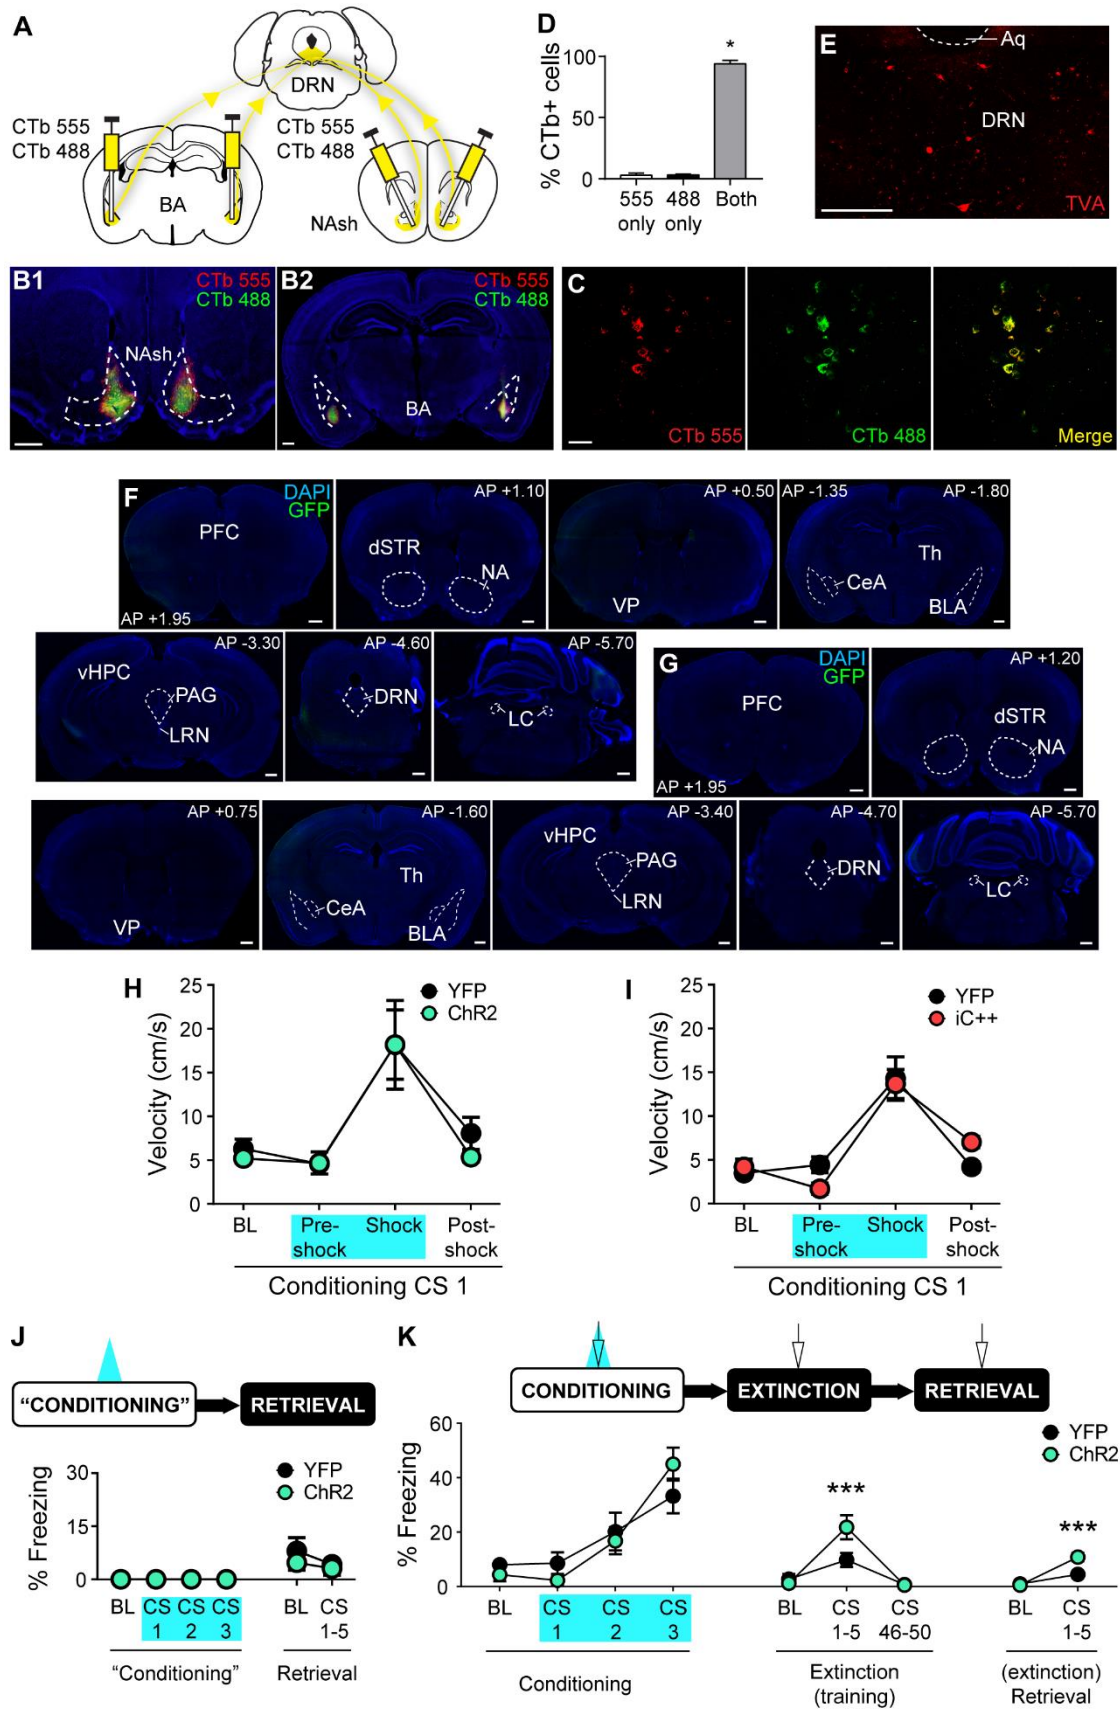

**Figure S3, related to Figures 2, 3, 4, 5, 6**

**Control experiments for anatomical and functional investigation of DRN 5-HT projection pathways**

(A-C) Bilateral dual CTb (555/488) injections into BA and NA (A). CTb (555/488) in NA (B1) and BA (B2). Scale bars=500  $\mu$ m. Overlay of dual CTb-labelled cells in DRN (C). Scale bar=40  $\mu$ m.

(D) CTb 555 and 488 infected the same cells (n=2 mice). Data are mean $\pm$ SEM. \*p<0.05 compared to theoretical zero.

(E) TVA expression enabling rabies tracing in DRN 5-HT neurons. Scale bar=250  $\mu$ m.

(F-G) No GFP-expressing neurons with cTRIO tracing lacking rabies starter proteins in DRN 5-HT projection pathways to BA (F) and NA (G). Scale bars=500  $\mu$ m.

(H-I) Locomotor activity during conditioning CS1 was not affected by laser stimulation in ChR2- (YFP n=8 mice, ChR2 n=8 mice) (H) or iC++-expressing (YFP n=8 mice, iC++ n=7 mice) (I) mice compared to YFP controls. Data are mean $\pm$ SEM.

(J) Pseudo fear conditioning with 20 Hz laser stimulation but without shocks did not elevate freezing (YFP n=9 mice, ChR2 n=9 mice). Data are mean $\pm$ SEM.

(K) *Top*: 3-day fear learning task with *in vivo* electrophysiological recordings. 20 Hz laser stimulation was delivered at conditioning during CS presentations. *Bottom*: ChR2-expressing mice froze more compared to YFP controls during extinction and retrieval (YFP n=9 mice, ChR2 n=9 mice). Data are mean $\pm$ SEM.

Aq—aqueduct, BL—baseline, BLA—basolateral amygdala, CeA—central amygdala, dSTR—dorsal striatum, LC—locus coeruleus, LRN—linear raphe nucleus, NAsh—nucleus accumbens shell, PAG—periaqueductal grey, PFC—prefrontal cortex, Th—thalamus, vHPC—ventral hippocampus, VP—ventral pallidum.

\*p<0.05, \*\*\*p<0.001.

**Table S1, related to Figure 2**

**Distribution of identified inputs onto DRN 5-HT pathways to BA and NA**

| Brain region                        | % Labelled input cells to DRN 5-HT pathway |             |                |              |
|-------------------------------------|--------------------------------------------|-------------|----------------|--------------|
|                                     | BA<br>n=5 mice                             |             | NA<br>n=5 mice |              |
|                                     | Mean                                       | SEM         | Mean           | SEM          |
| Anterior amygdaloid area            | 0.00                                       | 0.00        | 0.19           | 0.19         |
| Anterior hypothalamic area          | 0.00                                       | 0.00        | 0.58           | 0.58         |
| Basal amygdala                      | 0.01                                       | 0.01        | 0.00           | 0.00         |
| Bed nucleus of the stria terminalis | 2.61                                       | 2.61        | 0.03           | 0.03         |
| Caudate putamen                     | 0.00                                       | 0.00        | 0.02           | 0.02         |
| Central amygdala                    | 0.87                                       | 0.87        | 0.03           | 0.02         |
| Central grey of the pons            | 0.00                                       | 0.00        | 0.48           | 0.48         |
| Cerebellar peduncle                 | 0.00                                       | 0.00        | 0.29           | 0.18         |
| Cerebellum                          | 1.56                                       | 1.08        | 0.16           | 0.10         |
| Cingulate cortex                    | 0.47                                       | 0.47        | 0.00           | 0.00         |
| Deep mesencephalic nucleus          | 2.53                                       | 1.10        | 1.02           | 0.65         |
| <b>Dorsal raphe nucleus</b>         | <b>16.35</b>                               | <b>5.16</b> | <b>30.39</b>   | <b>10.24</b> |
| Dorsal tenia tecta                  | 0.00                                       | 0.00        | 0.02           | 0.02         |
| Dorsomedial tegmental area          | 0.00                                       | 0.00        | 0.85           | 0.75         |
| Epimicrocellular nucleus            | 0.00                                       | 0.00        | 0.02           | 0.02         |
| Gigantocellular reticular nucleus   | 2.11                                       | 1.18        | 0.40           | 0.38         |
| Granular insular cortex             | 0.00                                       | 0.00        | 1.19           | 1.19         |
| Inferior colliculus                 | 0.00                                       | 0.00        | 0.02           | 0.02         |
| Infralimbic prefrontal cortex       | 0.00                                       | 0.00        | 0.02           | 0.02         |
| Intermediate reticular nucleus      | 0.00                                       | 0.00        | 0.02           | 0.02         |
| Interpeduncular nucleus             | 0.00                                       | 0.00        | 0.97           | 0.96         |
| Interstitial nucleus of Cajal       | 0.05                                       | 0.05        | 0.00           | 0.00         |
| Lateral habenula                    | 0.00                                       | 0.00        | 0.37           | 0.17         |
| Lateral hypothalamus                | 0.01                                       | 0.01        | 2.96           | 1.52         |
| Lateral lemniscus                   | 0.43                                       | 0.43        | 0.00           | 0.00         |
| Lateral parabrachial nucleus        | 0.00                                       | 0.00        | 0.24           | 0.24         |
| Lateral septal nucleus              | 0.43                                       | 0.43        | 0.05           | 0.04         |
| Linear raphe nucleus                | 11.46                                      | 4.69        | 12.38          | 4.64         |
| <b>Locus coeruleus</b>              | <b>7.55</b>                                | <b>3.17</b> | <b>2.66</b>    | <b>1.15</b>  |
| Magnocellular preoptic nucleus      | 0.43                                       | 0.43        | 0.00           | 0.00         |
| Mammillary nucleus                  | 0.00                                       | 0.00        | 0.02           | 0.02         |
| Medial forebrain bundle             | 2.62                                       | 2.61        | 0.00           | 0.00         |
| Medial globus pallidus              | 0.00                                       | 0.00        | 0.01           | 0.01         |
| Medial lemniscus                    | 0.00                                       | 0.00        | 0.38           | 0.38         |
| Median raphe nucleus                | 0.00                                       | 0.00        | 1.19           | 0.69         |
| Mesencephalic trigeminal nucleus    | 0.42                                       | 0.42        | 0.00           | 0.00         |
| Motor root of the trigeminal nerve  | 0.00                                       | 0.00        | 0.02           | 0.02         |
| Nucleus accumbens core              | 1.30                                       | 1.30        | 0.00           | 0.00         |
| Nucleus accumbens shell             | 2.51                                       | 1.72        | 4.67           | 4.19         |

|                                                        |       |      |       |      |
|--------------------------------------------------------|-------|------|-------|------|
| Nucleus of origin of efferents of the vestibular nerve | 0.00  | 0.00 | 0.24  | 0.24 |
| Nucleus of the horizontal limb of the diagonal band    | 0.00  | 0.00 | 0.48  | 0.48 |
| Nucleus of the lateral lemniscus                       | 0.00  | 0.00 | 0.19  | 0.19 |
| Oculomotor nucleus                                     | 1.11  | 1.11 | 0.00  | 0.00 |
| Orbital cortex                                         | 0.00  | 0.00 | 0.31  | 0.17 |
| Paracochlear glial substance                           | 0.00  | 0.00 | 0.38  | 0.38 |
| Paralemniscal nucleus                                  | 0.00  | 0.00 | 0.02  | 0.02 |
| Parvicellular reticular nucleus                        | 0.00  | 0.00 | 0.26  | 0.23 |
| Pedunculo pontine tegmental nucleus                    | 0.87  | 0.00 | 0.47  | 0.19 |
| Periaqueductal grey                                    | 25.03 | 9.13 | 11.52 | 4.49 |
| Pontine nucleus                                        | 0.87  | 0.87 | 0.00  | 0.00 |
| Pontine reticular nucleus                              | 0.02  | 0.02 | 2.27  | 0.99 |
| Posterior hypothalamic area                            | 0.00  | 0.00 | 0.01  | 0.01 |
| Posterior thalamic nuclear group                       | 0.00  | 0.00 | 0.09  | 0.07 |
| Prelimbic cortex                                       | 0.43  | 0.43 | 0.00  | 0.00 |
| Preoptic area                                          | 0.00  | 0.00 | 0.32  | 0.17 |
| Primary motor cortex                                   | 0.43  | 0.43 | 0.24  | 0.24 |
| Primary somatosensory cortex                           | 1.21  | 1.21 | 0.00  | 0.00 |
| Principal sensory trigeminal nucleus                   | 0.00  | 0.00 | 0.03  | 0.02 |
| Raphe magnus nucleus                                   | 0.00  | 0.00 | 0.10  | 0.07 |
| Red nucleus                                            | 0.00  | 0.00 | 0.01  | 0.01 |
| Reticulotegmental nucleus of the pons                  | 0.43  | 0.43 | 0.25  | 0.19 |
| Retrosplenial agranular cortex                         | 0.00  | 0.00 | 0.01  | 0.01 |
| Secondary motor cortex                                 | 0.00  | 0.00 | 0.23  | 0.18 |
| Substantia nigra pars reticulata                       | 0.43  | 0.43 | 4.41  | 3.11 |
| Superior cerebellar peduncle                           | 2.87  | 2.10 | 0.00  | 0.00 |
| Superior colliculus                                    | 9.34  | 6.20 | 6.62  | 3.06 |
| Superior vestibular nucleus                            | 0.00  | 0.00 | 0.99  | 0.94 |
| Tuber cinereum area                                    | 0.01  | 0.01 | 0.00  | 0.00 |
| Ventral anterior thalamic nucleus                      | 0.00  | 0.00 | 0.02  | 0.02 |
| Ventral pallidum                                       | 0.02  | 0.02 | 6.93  | 2.70 |
| Ventral tegmental area                                 | 2.01  | 1.40 | 1.01  | 0.49 |
| Ventromedial hypothalamic nucleus                      | 0.00  | 0.00 | 0.24  | 0.18 |
| Ventromedial thalamic nucleus                          | 0.03  | 0.03 | 0.00  | 0.00 |
| Visual tegmental relay zone                            | 1.11  | 1.11 | 0.00  | 0.00 |
| Zona incerta                                           | 0.00  | 0.00 | 0.71  | 0.71 |



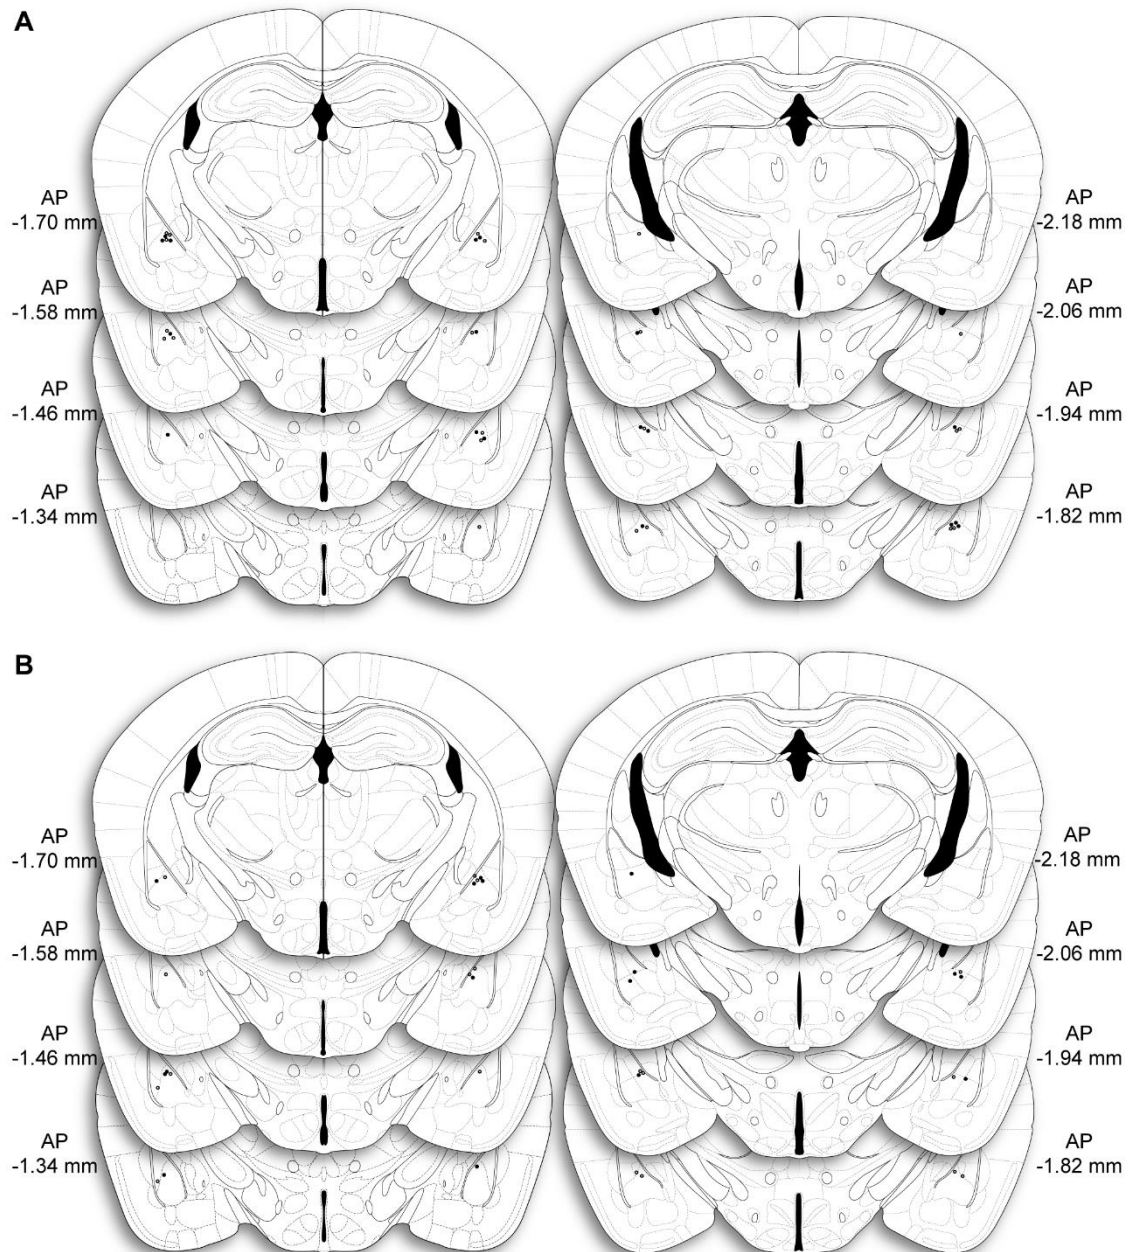

**Figure S4, related to Figure 3**

**BA placements for *in vivo* optogenetics in DRN 5-HT projections during fear conditioning**

(A-B) BA placements of optical fibre implants in ChR2- (A) and iC++-injected (B) 5-HTT-Cre mice. Dots demarcate fibre tip placement; solid are from opsin and empty from YFP animals.

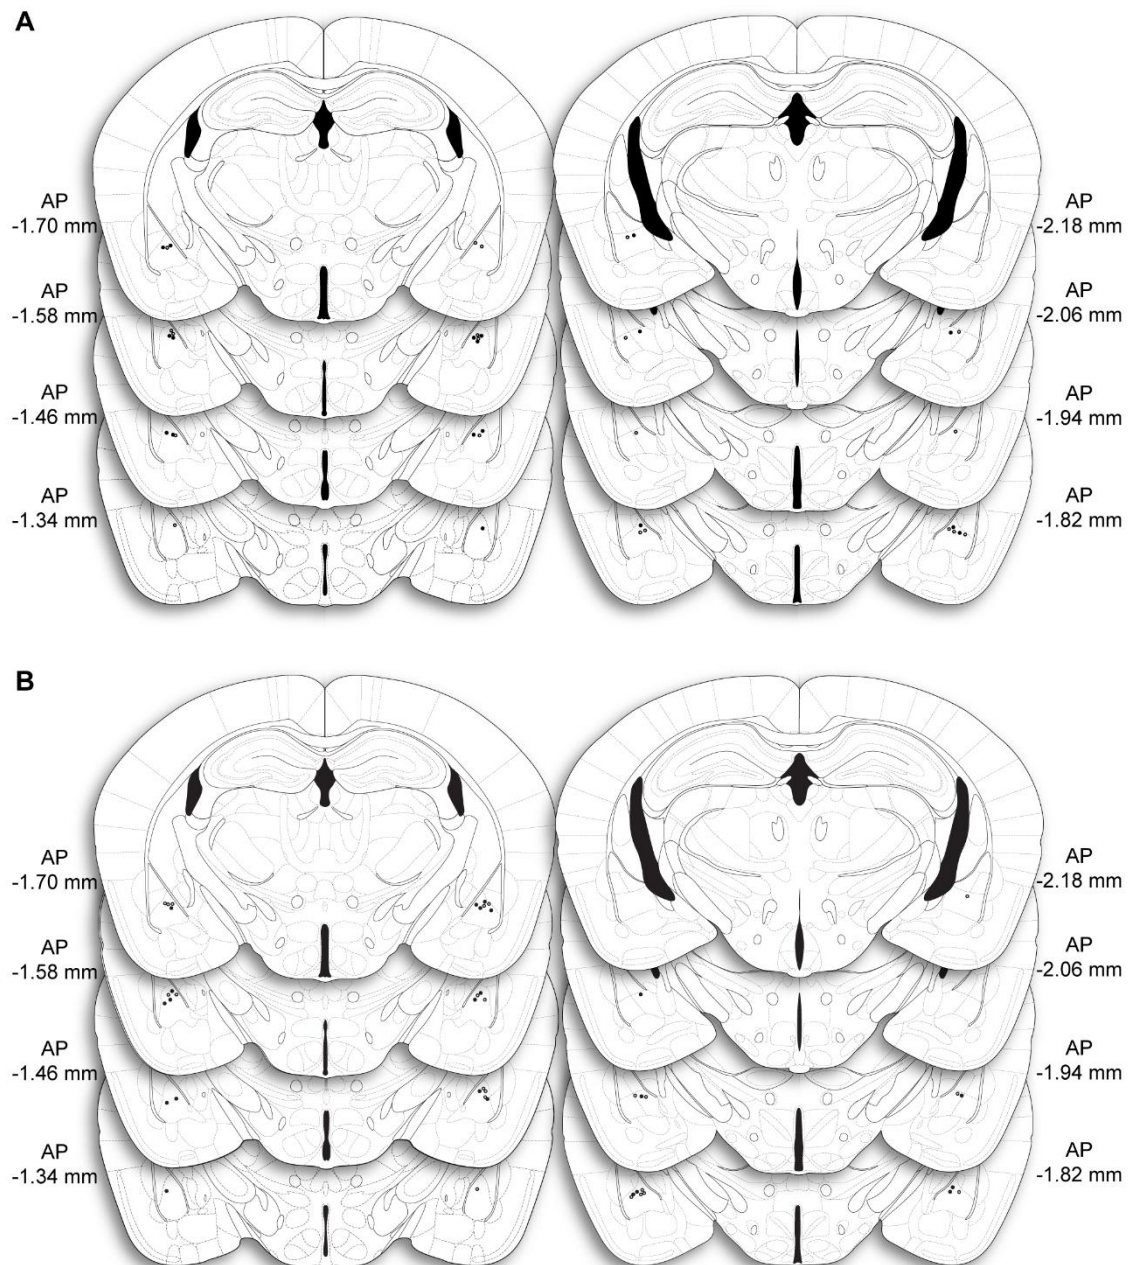

**Figure S5, related to Figure 3**

**BA placements for *in vivo* optogenetics in DRN 5-HT projections during fear extinction**  
 (A-B) BA placements of optical fibre implants in ChR2- (A) and iC++-injected (B) 5-HTT-Cre mice. Dots demarcate fibre tip placement; solid are from opsin and empty from YFP animals.

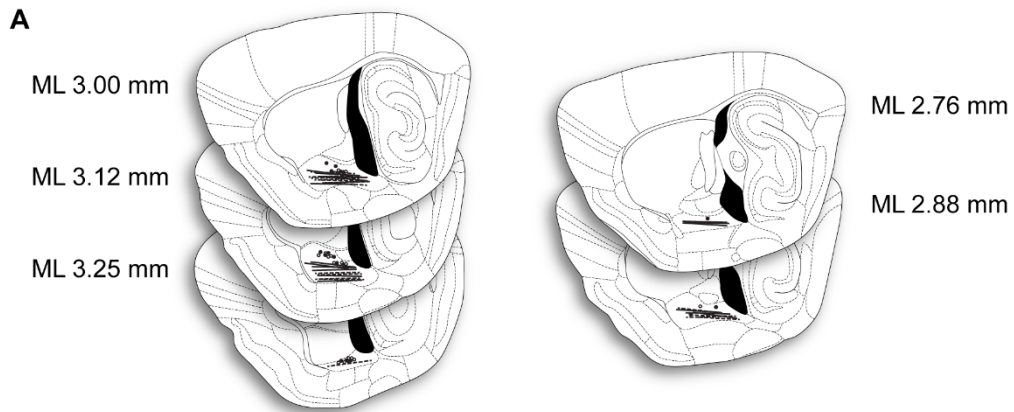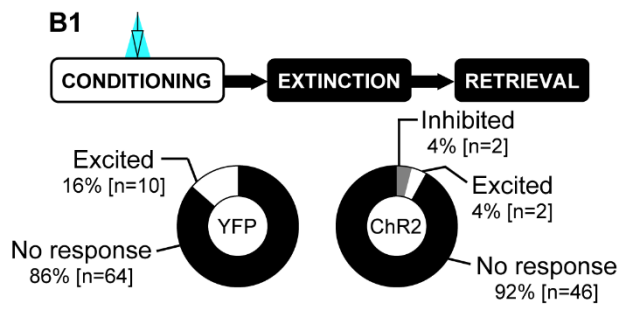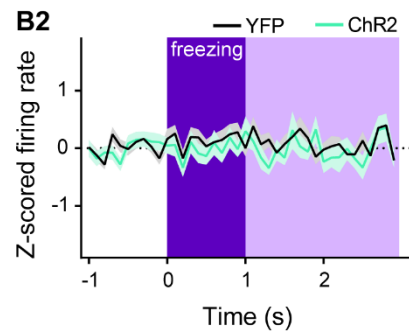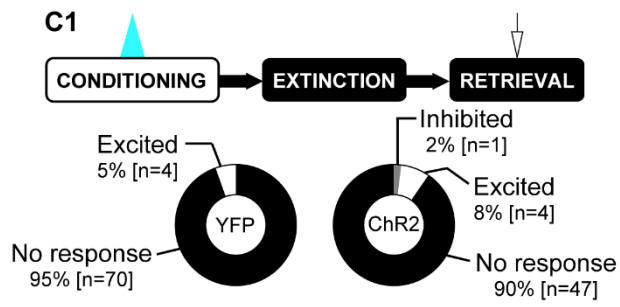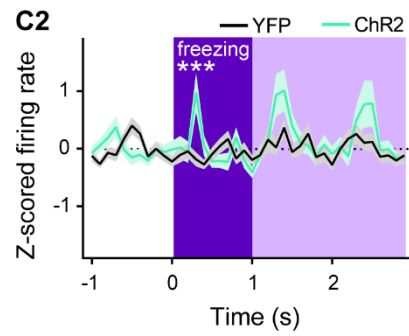

**Figure S6, related to Figures 4, 5, 6**

**DRN→BA 5-HT pathway alters BA neuronal activity during fear behaviour**

(A) Sagittal BA placements of optrode array implants in ChR2-injected 5-HTT-Cre mice. Dots demarcate fibre tip placement; solid are from ChR2 and empty from YFP animals. Lines depict electrode array placement; solid are from ChR2 and dashed from YFP animals.

(B1) *Top*: 3-day fear learning task. 20 Hz laser stimulation was delivered at conditioning during CS presentations. *In vivo* electrophysiology data from conditioning. *Bottom*: No difference in proportion of BA single unit firing during freezing onset (YFP n=74 units, 9 mice; ChR2 n=50 units, 8 mice).

(B2) No difference between firing rates of BA single units in ChR2 vs. YFP mice during freezing onset (YFP n=74 units, 9 mice; ChR2 n=50 units, 8 mice). Traces show mean±SEM of z-scored firing rate. ±1.96 represents statistically significant change from baseline (2-tailed,  $\alpha=0.05$ ).

(C1) *Top*: 3-day fear learning task. 20 Hz laser stimulation was delivered at conditioning during CS presentations. *In vivo* electrophysiology data from retrieval. *Bottom*: No difference in proportion of BA single unit firing during freezing onset (YFP n=74 units, 8 mice; ChR2 n=52 units, 9 mice).

(C2) Firing rates of BA single units in ChR2-expressing mice was higher than that of YFP controls during freezing onset (YFP n=74 units, 8 mice; ChR2 n=50 units, 8 mice). Traces show mean±SEM of z-scored firing rate. ±1.96 represents statistically significant change from baseline (2-tailed,  $\alpha=0.05$ ).

\*\*\* $p<0.001$ .

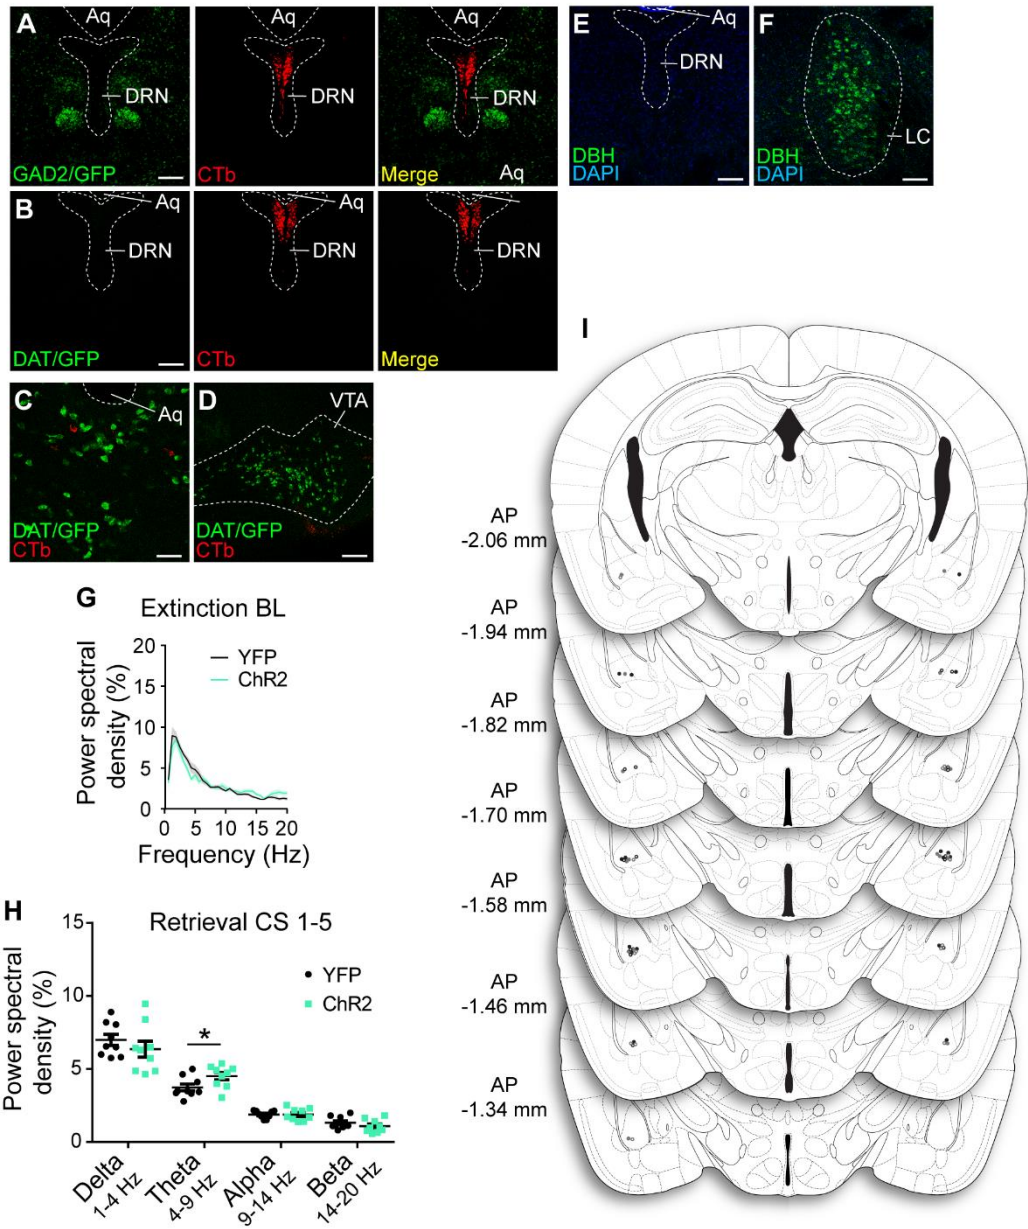

**Figure S7, related to Figures 5, 6, 7**

**Anatomical and functional investigation of DRN→BA 5-HT pathway**

(A-B) Overlay of CTb+ and GAD2- (A) or DAT-expressing (B) cells in middle/caudal DRN. Scale bars=150  $\mu$ m.

(C-D) CTb+ and DAT-expressing cells in rostral DRN (C) and VTA (D). Scale bars=50  $\mu$ m (C) and 150  $\mu$ m (D).

(E-F) DBH+ (noradrenergic) cells in DRN (E) and locus coeruleus (F). Scale bars=150  $\mu$ m (E) and 50  $\mu$ m (F).

(G) Power spectral densities of BA local field potentials during extinction baseline (YFP n=9 mice, ChR2 n=8 mice). Data are mean $\pm$ SEM.

(H) Mean power spectral densities of BA local field potentials in delta, theta, alpha, and beta oscillation ranges during retrieval CS presentations (YFP n=9 mice, ChR2 n=9 mice). Data are mean $\pm$ SEM.

(I) BA placements of opto-fluid cannula implants in ChR2-injected 5-HTT-Cre mice. Dots demarcate infusion site; solid are from ChR2 and empty from YFP animals, black are from drug-treated and grey from vehicle-treated animals.

Aq—aqueduct, LC—locus coeruleus, VTA—ventral tegmental area.

\*p<0.05.

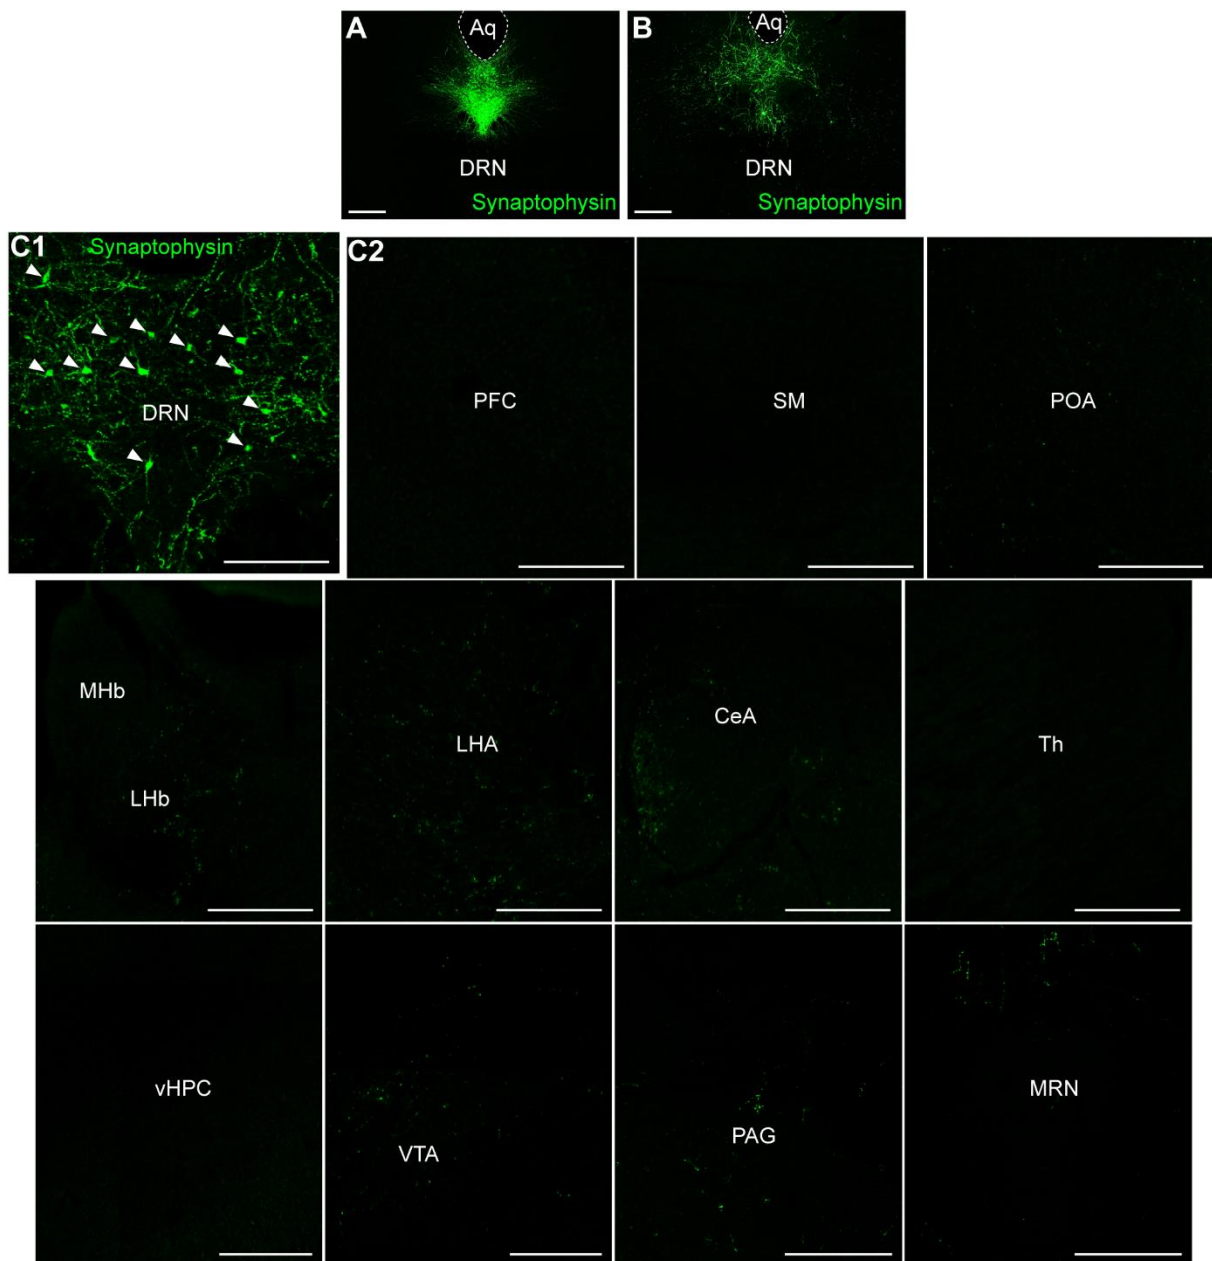

**Figure S8, related to Figure 8**

**Anatomical specificity of DRN→BA 5-HT pathway**

(A-B) Cre-dependent fluorescent synaptophysin expression in DRN of 5-HTT-Cre mice (A) or wild-type mice injected with retro Cre in BA (B). Scale bars=250  $\mu$ m.

(C) In wild-type mice injected with retro Cre in BA and Cre-dependent fluorescent synaptophysin in DRN, cell bodies were transfected in DRN (C1), but not in other brain regions (C2). Scale bars=250  $\mu$ m.

Aq—aqueduct, CeA—central amygdala, LC—locus coeruleus, LHA—lateral hypothalamus, LHb—lateral habenula, MHb—medial habenula, MRN—median raphe nucleus, PAG—periaqueductal grey, PFC—prefrontal cortex, POA—preoptic area, SM—sensory/motor cortices, Th—thalamus, vHPC—ventral hippocampus, VTA—ventral tegmental area.
